# Supplementary material for: Identification of bZIP transcription factors and their responses to brown spot in pear
Source: PubMed Central journal article supplement (PMC8802300; doi:10.1590/1678-4685-gmb-2021-0175), 2022-01-31
Supplement: 1415-4757-GMB-45-1-e20210175-s1.pdf [file 1415-4757-GMB-45-1-e20210175-s1.pdf]

**“Supplementary Material to “Identification of bZIP transcription factors and their responses to brown spot in pear”**

**Table S1** - Gene information and primer sequences used for qRT-PCR analysis.

| Gene            | Primer sequences         | Product length (bp) |
|-----------------|--------------------------|---------------------|
| <i>PbbZIP11</i> | F:CATGGCTTCTTCAAGTGGGG   | 189                 |
|                 | R:CAGGAGACCAATCTGAGCGG   |                     |
| <i>PbbZIP16</i> | F:GGAGACGAAGACAACACCTGC  | 202                 |
|                 | R:CATATGGGTGTGGAGGGGTAC  |                     |
| <i>PbbZIP17</i> | F:GGAAATCAACGGAACAACGC   | 191                 |
|                 | R:AGGGAGCACGCACGAGTATG   |                     |
| <i>PbbZIP44</i> | F:TGGCCACTGCTGACATGCT    | 233                 |
|                 | R:CACCACCAACCACTAATAACCG |                     |
| <i>PbbZIP53</i> | F:TTGGGATAAATTACCCGAGGA  | 222                 |
|                 | R:GTGTCTGCCGAACCTGATTGT  |                     |
| <i>PbbZIP60</i> | F:CCGCCATCATCATCTCTTC    | 216                 |
|                 | R:GGTCAGTGGAAGGCAGTTG    |                     |
