# Supplementary material for: Identification of bZIP transcription factors and their responses to brown spot in pear
Source: PubMed Central journal article supplement (PMC8802300; doi:10.1590/1678-4685-gmb-2021-0175), 2022-01-31
Supplement: 1415-4757-GMB-45-1-e20210175-s2.pdf [file 1415-4757-GMB-45-1-e20210175-s2.pdf]

## “Supplementary Material to “Identification of bZIP transcription factors and their responses to brown spot in pear”

**Table S2** - Primary information on bZIP proteins in the genome of pear.

| Name     | Gene ID         | Chromosome | CDS length | Amino acid length | Molecular weight | pI       | Predictive subcellular localization |         |
|----------|-----------------|------------|------------|-------------------|------------------|----------|-------------------------------------|---------|
| PbBZIP1  | Pbr029239<br>.1 | Chr1       | 459        | 153               | 37002.51         | 5.21     | Nuclear                             |         |
| PbBZIP2  | Pbr021041<br>.1 | Chr1       | 1272       | 424               | 103784.4         | 5.02     | Nuclear                             |         |
| PbBZIP3  | Pbr012802<br>.1 | Chr2       | 1278       | 426               | 8                | 5.01     | Nuclear                             |         |
| PbBZIP4  | Pbr015675<br>.1 | Chr2       | 1002       | 334               | 106336.1         | 5.08     | Nuclear                             |         |
| PbBZIP5  | Pbr022933<br>.1 | Chr2       | 738        | 246               | 81861.27         | 5.14     | Nuclear                             |         |
| PbBZIP6  | Pbr022894<br>.1 | Chr2       | 2187       | 729               | 60257.42         | 4.92     | Nuclear                             |         |
| PbBZIP7  | Pbr024746<br>.1 | Chr2       | 909        | 303               | 180005.1         | 5.12     | Nuclear                             |         |
| PbBZIP8  | Pbr001076<br>.1 | Chr2       | 702        | 234               | 59516.09         | 5.08     | Nuclear                             |         |
| PbBZIP9  | Pbr040479<br>.1 | Chr2       | 474        | 158               | 38717.26         | 5.22     | Nuclear                             |         |
| PbBZIP10 | Pbr022685<br>.1 | Chr3       | 429        | 143               | 35020.58         | 5.20     | Nuclear                             |         |
| PbBZIP11 | Pbr026741<br>.1 | Chr3       | 1062       | 354               | 88421.84         | 5.00     | Nuclear                             |         |
| PbBZIP12 | Pbr003518<br>.1 | Chr3       | 1542       | 514               | 126929.1         | 4.97     | Nuclear                             |         |
| PbBZIP13 | Pbr003516<br>.1 | Chr3       | 1263       | 421               | 6                | 5.05     | Nuclear                             |         |
| PbBZIP14 | Pbr013267<br>.1 | Chr3       | 1362       | 454               | 8                | 111618.9 | 5.01                                | Nuclear |
| PbBZIP15 | Pbr013209<br>.1 | Chr3       | 615        | 205               | 0                | 51696.62 | 5.10                                | Nuclear |

| Name     | Gene ID         | Chromosome | CDS length | Amino acid length | Molecular weight | pI   | Predictive subcellular localization |
|----------|-----------------|------------|------------|-------------------|------------------|------|-------------------------------------|
| PbBZIP16 | Pbr013133<br>.1 | Chr3       | 1317       | 439               | 109089.1         | 4.97 | Nuclear                             |
| PbBZIP17 | Pbr013043<br>.1 | Chr3       | 1131       | 377               | 91706.00         | 5.05 | Nuclear                             |
| PbBZIP18 | Pbr010517<br>.1 | Chr5       | 1047       | 349               | 87658.63         | 4.98 | Nuclear                             |
| PbBZIP19 | Pbr030476<br>.1 | Chr5       | 861        | 287               | 70264.79         | 5.06 | Nuclear                             |
| PbBZIP20 | Pbr027414<br>.1 | Chr5       | 774        | 258               | 62484.89         | 5.15 | Nuclear                             |
| PbBZIP21 | Pbr035554<br>.1 | Chr5       | 369        | 123               | 30140.67         | 5.27 | Nuclear                             |
| PbBZIP22 | Pbr025283<br>.1 | Chr5       | 1377       | 459               | 113870.2         | 4.97 | Nuclear                             |
| PbBZIP23 | Pbr014592<br>.1 | Chr5       | 1350       | 450               | 110069.2         | 5.02 | Nuclear                             |
| PbBZIP24 | Pbr014594<br>.1 | Chr5       | 1533       | 511               | 126201.1         | 4.97 | Nuclear                             |
| PbBZIP25 | Pbr020210<br>.1 | Chr6       | 465        | 155               | 38571.02         | 5.18 | Nuclear                             |
| PbBZIP26 | Pbr014120<br>.1 | Chr6       | 957        | 319               | 78273.16         | 5.14 | Nuclear                             |
| PbBZIP27 | Pbr015119<br>.3 | Chr6       | 1002       | 334               | 82957.30         | 5.05 | Nuclear                             |
| PbBZIP28 | Pbr016302<br>.1 | Chr6       | 1284       | 428               | 106290.6         | 5.03 | Nuclear                             |
| PbBZIP29 | Pbr002928<br>.1 | Chr7       | 726        | 242               | 60228.35         | 5.10 | Nuclear                             |
| PbBZIP30 | Pbr002981<br>.1 | Chr7       | 726        | 242               | 60228.35         | 5.10 | Nuclear                             |
| PbBZIP31 | Pbr009654<br>.1 | Chr7       | 2229       | 743               | 183693.9         | 4.91 | Nuclear                             |
| PbBZIP32 | Pbr009693<br>.1 | Chr7       | 510        | 170               | 41850.96         | 5.20 | Nuclear                             |
| PbBZIP33 | Pbr041663<br>.1 | Chr7       | 1002       | 334               | 81937.17         | 5.08 | Nuclear                             |
| PbBZIP34 | Pbr008557<br>.1 | Chr8       | 1086       | 362               | 89039.85         | 5.05 | Nuclear                             |
| PbBZIP35 | Pbr008558<br>.1 | Chr8       | 987        | 329               | 80606.59         | 5.10 | Nuclear                             |
| PbBZIP36 | Pbr018746       | Chr8       | 945        | 315               | 77155.28         | 5.09 | Nuclear                             |

| Name     | Gene ID   | Chromosome | CDS length | Amino acid length | Molecular weight | pI   | Predictive subcellular localization |
|----------|-----------|------------|------------|-------------------|------------------|------|-------------------------------------|
|          | .1        |            |            |                   |                  |      |                                     |
| PbBZIP37 | Pbr028080 |            |            |                   | 141366.5         | 4.95 | Nuclear                             |
|          | .1        | Chr8       | 1728       | 576               | 7                |      |                                     |
|          | Pbr028081 |            |            |                   | 124372.5         | 4.98 | Nuclear                             |
| PbBZIP38 | .1        | Chr8       | 1515       | 505               | 8                |      |                                     |
|          | Pbr022222 |            |            |                   | 51409.73         | 5.12 | Nuclear                             |
| PbBZIP39 | .1        | Chr9       | 609        | 203               |                  |      |                                     |
|          | Pbr029701 |            |            |                   | 83949.56         | 5.07 | Nuclear                             |
| PbBZIP40 | .1        | Chr9       | 1044       | 348               |                  |      |                                     |
|          | Pbr030604 |            |            |                   | 110994.2         | 4.99 | Nuclear                             |
| PbBZIP41 | .1        | Chr9       | 1341       | 447               | 8                |      |                                     |
|          | Pbr009074 |            |            |                   | 87682.68         | 5.05 | Nuclear                             |
| PbBZIP42 | .1        | Chr10      | 1047       | 349               |                  |      |                                     |
|          | Pbr019461 |            |            |                   | 75190.30         | 5.05 | Nuclear                             |
| PbBZIP43 | .1        | Chr10      | 921        | 307               |                  |      |                                     |
|          | Pbr020743 |            |            |                   | 65307.20         | 5.14 | Nuclear                             |
| PbBZIP44 | .1        | Chr10      | 807        | 269               |                  |      |                                     |
|          | Pbr036339 |            |            |                   | 85837.44         | 4.98 | Nuclear                             |
| PbBZIP45 | .1        | Chr10      | 1026       | 342               |                  |      |                                     |
|          | Pbr042765 |            |            |                   | 65339.26         | 5.14 | Nuclear                             |
| PbBZIP46 | .1        | Chr10      | 807        | 269               |                  |      |                                     |
|          | Pbr017284 |            |            |                   | 88080.80         | 5.01 | Nuclear                             |
| PbBZIP47 | .1        | Chr11      | 1050       | 350               |                  |      |                                     |
|          | Pbr030829 |            |            |                   | 34915.64         | 5.19 | Nuclear                             |
| PbBZIP48 | .1        | Chr11      | 426        | 142               |                  |      |                                     |
|          | Pbr036605 |            |            |                   | 127084.0         | 4.97 | Nuclear                             |
| PbBZIP49 | .1        | Chr11      | 1539       | 513               | 1                |      |                                     |
|          | Pbr038249 |            |            |                   | 88119.40         | 5.00 | Nuclear                             |
| PbBZIP50 | .1        | Chr11      | 1056       | 352               |                  |      |                                     |
|          | Pbr004364 |            |            |                   | 120776.1         | 4.96 | Nuclear                             |
| PbBZIP51 | .1        | Chr12      | 1461       | 487               | 8                |      |                                     |
|          | Pbr017778 |            |            |                   | 105631.2         | 5.03 | Nuclear                             |
| PbBZIP52 | .1        | Chr12      | 1320       | 440               | 0                |      |                                     |
|          | Pbr028659 |            |            |                   | 111177.2         | 5.02 | Nuclear                             |
| PbBZIP53 | .1        | Chr12      | 1359       | 453               | 2                |      |                                     |
|          | Pbr035863 |            |            |                   | 110860.9         | 5.00 | Nuclear                             |
| PbBZIP54 | .1        | Chr12      | 1338       | 446               | 0                |      |                                     |
|          | Pbr018534 |            |            |                   | 39890.08         | 5.19 | Nuclear                             |
| PbBZIP55 | .1        | Chr13      | 483        | 161               |                  |      |                                     |
|          | Pbr018536 |            |            |                   | 35128.70         | 5.21 | Nuclear                             |
| PbBZIP56 | .1        | Chr13      | 429        | 143               |                  |      |                                     |

| Name     | Gene ID         | Chromosome | CDS length | Amino acid length | Molecular weight | pI   | Predictive subcellular localization |
|----------|-----------------|------------|------------|-------------------|------------------|------|-------------------------------------|
| PbBZIP57 | Pbr027468<br>.1 | Chr13      | 1572       | 524               | 129393.0         | 4.97 | Nuclear                             |
| PbBZIP58 | Pbr030038<br>.1 | Chr13      | 615        | 205               | 51608.22         | 5.11 | Nuclear                             |
| PbBZIP59 | Pbr034805<br>.1 | Chr13      | 846        | 282               | 73106.83         | 5.03 | Nuclear                             |
| PbBZIP60 | Pbr007163<br>.1 | Chr14      | 639        | 213               | 54582.04         | 5.13 | Nuclear                             |
| PbBZIP61 | Pbr007589<br>.1 | Chr14      | 1326       | 442               | 106260.0         | 5.03 | Nuclear                             |
| PbBZIP62 | Pbr026723<br>.2 | Chr14      | 918        | 306               | 72968.14         | 5.15 | Nuclear                             |
| PbBZIP63 | Pbr002622<br>.1 | Chr15      | 510        | 170               | 39988.34         | 5.22 | Nuclear                             |
| PbBZIP64 | Pbr005860<br>.1 | Chr15      | 1734       | 578               | 142187.5         | 4.95 | Nuclear                             |
| PbBZIP65 | Pbr005861<br>.1 | Chr15      | 1584       | 528               | 130031.9         | 4.97 | Nuclear                             |
| PbBZIP66 | Pbr005914<br>.1 | Chr15      | 474        | 158               | 38946.34         | 5.17 | Nuclear                             |
| PbBZIP67 | Pbr009262<br>.1 | Chr15      | 1047       | 349               | 85399.04         | 5.05 | Nuclear                             |
| PbBZIP68 | Pbr017262<br>.1 | Chr15      | 1050       | 350               | 84480.35         | 5.06 | Nuclear                             |
| PbBZIP69 | Pbr019779<br>.1 | Chr15      | 459        | 153               | 36880.16         | 5.22 | Nuclear                             |
| PbBZIP70 | Pbr026913<br>.1 | Chr15      | 1089       | 363               | 89452.94         | 5.06 | Nuclear                             |
| PbBZIP71 | Pbr027818<br>.1 | Chr15      | 495        | 165               | 38527.54         | 5.23 | Nuclear                             |
| PbBZIP72 | Pbr031203<br>.1 | Chr15      | 1053       | 351               | 88965.04         | 5.03 | Nuclear                             |
| PbBZIP73 | Pbr033760<br>.1 | Chr15      | 603        | 201               | 50546.63         | 5.12 | Nuclear                             |
| PbBZIP74 | Pbr037165<br>.1 | Chr16      | 1230       | 410               | 100300.0         | 5.03 | Nuclear                             |
| PbBZIP75 | Pbr016568<br>.1 | Chr17      | 609        | 203               | 51459.80         | 5.13 | Nuclear                             |
| PbBZIP76 | Pbr017979<br>.1 | Chr17      | 459        | 153               | 37002.51         | 5.21 | Nuclear                             |
| PbBZIP77 | Pbr022503       | Chr17      | 888        | 296               | 73866.48         | 5.05 | Nuclear                             |

| <b>Name</b> | <b>Gene ID</b> | <b>Chromosome</b> | <b>CDS length</b> | <b>Amino acid length</b> | <b>Molecular weight</b> | <b>pI</b> | <b>Predictive subcellular localization</b> |
|-------------|----------------|-------------------|-------------------|--------------------------|-------------------------|-----------|--------------------------------------------|
|             | .1             |                   |                   |                          |                         |           |                                            |
|             | Pbr002338      | scaffold1099.     |                   |                          | 104000.2                | 5.04      | Nuclear                                    |
| PbBZIP78    | .1             | 0                 | 1260              | 420                      | 2                       |           |                                            |
|             | Pbr003750      | scaffold1170.     |                   |                          | 60094.16                | 5.11      | Nuclear                                    |
| PbBZIP79    | .1             | 0                 | 726               | 242                      |                         |           |                                            |
|             | Pbr005556      | scaffold1282.     |                   |                          | 129985.8                | 4.97      | Nuclear                                    |
| PbBZIP80    | .1             | 0                 | 1584              | 528                      | 9                       |           |                                            |
|             | Pbr005557      | scaffold1282.     |                   |                          | 142205.6                | 4.95      | Nuclear                                    |
| PbBZIP81    | .1             | 0                 | 1734              | 578                      | 1                       |           |                                            |
|             | Pbr006046      | scaffold1301.     |                   |                          | 54007.24                | 5.16      | Nuclear                                    |
| PbBZIP82    | .1             | 0                 | 669               | 223                      |                         |           |                                            |
|             | Pbr010436      | scaffold170.2.    |                   |                          | 77427.37                | 5.09      | Nuclear                                    |
| PbBZIP83    | .1             | 1                 | 969               | 323                      |                         |           |                                            |
|             | Pbr040390      |                   |                   |                          | 109558.8                | 5.05      | Nuclear                                    |
| PbBZIP84    | .1             | scaffold888.0     | 1368              | 456                      | 8                       |           |                                            |
