# Supplementary material for: Identification of bZIP transcription factors and their responses to brown spot in pear
Source: PubMed Central journal article supplement (PMC8802300; doi:10.1590/1678-4685-gmb-2021-0175), 2022-01-31
Supplement: 1415-4757-GMB-45-1-e20210175-s3.pdf [file 1415-4757-GMB-45-1-e20210175-s3.pdf]

**“Supplementary Material to “Identification of bZIP transcription factors and their responses to brown spot in pear”**

**Table S3** - Genomic length, exon number and length of PbbZIPs.

| Name     | Gene ID     | Genomic length(bp) | Exon number | Exon length |
|----------|-------------|--------------------|-------------|-------------|
| PbBZIP1  | Pbr029239.1 | 776                | 1           | 776         |
| PbBZIP2  | Pbr021041.1 | 3070               | 12          | 1272        |
| PbBZIP3  | Pbr012802.1 | 2422               | 6           | 1278        |
| PbBZIP4  | Pbr015675.1 | 7494               | 8           | 1563        |
| PbBZIP5  | Pbr022933.1 | 1005               | 1           | 1005        |
| PbBZIP6  | Pbr022894.1 | 3636               | 2           | 2480        |
| PbBZIP7  | Pbr024746.1 | 6021               | 2           | 5934        |
| PbBZIP8  | Pbr001076.1 | 702                | 1           | 702         |
| PbBZIP9  | Pbr040479.1 | 1263               | 1           | 1263        |
| PbBZIP10 | Pbr022685.1 | 1331               | 1           | 1331        |
| PbBZIP11 | Pbr026741.1 | 2330               | 4           | 1333        |
| PbBZIP12 | Pbr003518.1 | 7673               | 12          | 1542        |
| PbBZIP13 | Pbr003516.1 | 3136               | 4           | 1263        |
| PbBZIP14 | Pbr013267.1 | 3205               | 9           | 1362        |
| PbBZIP15 | Pbr013209.1 | 615                | 1           | 615         |
| PbBZIP16 | Pbr013133.1 | 2663               | 4           | 1624        |
| PbBZIP17 | Pbr013043.1 | 4511               | 5           | 1131        |
| PbBZIP18 | Pbr010517.1 | 3817               | 4           | 1047        |
| PbBZIP19 | Pbr030476.1 | 987                | 2           | 861         |
| PbBZIP20 | Pbr027414.1 | 774                | 1           | 774         |
| PbBZIP21 | Pbr035554.1 | 643                | 3           | 369         |
| PbBZIP22 | Pbr025283.1 | 2891               | 6           | 1732        |
| PbBZIP23 | Pbr014592.1 | 3895               | 5           | 1350        |
| PbBZIP24 | Pbr014594.1 | 6898               | 12          | 1533        |
| PbBZIP25 | Pbr020210.1 | 465                | 1           | 465         |

| <b>Name</b> | <b>Gene ID</b> | <b>Genomic length(bp)</b> | <b>Exon number</b> | <b>Exon length</b> |
|-------------|----------------|---------------------------|--------------------|--------------------|
| PbBZIP26    | Pbr014120.1    | 2526                      | 6                  | 957                |
| PbBZIP27    | Pbr015119.3    | 1366                      | 2                  | 1002               |
| PbBZIP28    | Pbr016302.1    | 5786                      | 12                 | 1284               |
| PbBZIP29    | Pbr002928.1    | 2293                      | 4                  | 726                |
| PbBZIP30    | Pbr002981.1    | 2293                      | 4                  | 726                |
| PbBZIP31    | Pbr009654.1    | 4282                      | 2                  | 2605               |
| PbBZIP32    | Pbr009693.1    | 510                       | 1                  | 510                |
| PbBZIP33    | Pbr041663.1    | 6918                      | 8                  | 1572               |
| PbBZIP34    | Pbr008557.1    | 2323                      | 8                  | 1086               |
| PbBZIP35    | Pbr008558.1    | 1420                      | 3                  | 987                |
| PbBZIP36    | Pbr018746.1    | 2876                      | 6                  | 945                |
| PbBZIP37    | Pbr028080.1    | 2934                      | 4                  | 1728               |
| PbBZIP38    | Pbr028081.1    | 2605                      | 4                  | 1515               |
| PbBZIP39    | Pbr022222.1    | 742                       | 1                  | 742                |
| PbBZIP40    | Pbr029701.1    | 4209                      | 11                 | 2250               |
| PbBZIP41    | Pbr030604.1    | 6017                      | 10                 | 1341               |
| PbBZIP42    | Pbr009074.1    | 2211                      | 6                  | 1047               |
| PbBZIP43    | Pbr019461.1    | 4748                      | 5                  | 1510               |
| PbBZIP44    | Pbr020743.1    | 2803                      | 2                  | 2236               |
| PbBZIP45    | Pbr036339.1    | 4061                      | 4                  | 1511               |
| PbBZIP46    | Pbr042765.1    | 1665                      | 2                  | 1098               |
| PbBZIP47    | Pbr017284.1    | 2602                      | 5                  | 1050               |
| PbBZIP48    | Pbr030829.1    | 1351                      | 1                  | 1351               |
| PbBZIP49    | Pbr036605.1    | 6655                      | 11                 | 1539               |
| PbBZIP50    | Pbr038249.1    | 2420                      | 4                  | 1471               |
| PbBZIP51    | Pbr004364.1    | 3444                      | 6                  | 1678               |
| PbBZIP52    | Pbr017778.1    | 2686                      | 4                  | 1794               |
| PbBZIP53    | Pbr028659.1    | 5558                      | 11                 | 1359               |
| PbBZIP54    | Pbr035863.1    | 7416                      | 10                 | 1338               |
| PbBZIP55    | Pbr018534.1    | 1401                      | 1                  | 1401               |
| PbBZIP56    | Pbr018536.1    | 429                       | 1                  | 429                |
| PbBZIP57    | Pbr027468.1    | 3252                      | 10                 | 1572               |
| PbBZIP58    | Pbr030038.1    | 894                       | 1                  | 894                |

| <b>Name</b> | <b>Gene ID</b> | <b>Genomic length(bp)</b> | <b>Exon number</b> | <b>Exon length</b> |
|-------------|----------------|---------------------------|--------------------|--------------------|
| PbBZIP59    | Pbr034805.1    | 1468                      | 3                  | 846                |
| PbBZIP60    | Pbr007163.1    | 639                       | 1                  | 639                |
| PbBZIP61    | Pbr007589.1    | 2787                      | 4                  | 1853               |
| PbBZIP62    | Pbr026723.2    | 2626                      | 7                  | 918                |
| PbBZIP63    | Pbr002622.1    | 2735                      | 4                  | 1000               |
| PbBZIP64    | Pbr005860.1    | 2944                      | 4                  | 1734               |
| PbBZIP65    | Pbr005861.1    | 2759                      | 4                  | 1584               |
| PbBZIP66    | Pbr005914.1    | 1555                      | 1                  | 1555               |
| PbBZIP67    | Pbr009262.1    | 2876                      | 6                  | 1408               |
| PbBZIP68    | Pbr017262.1    | 2736                      | 11                 | 1050               |
| PbBZIP69    | Pbr019779.1    | 459                       | 1                  | 459                |
| PbBZIP70    | Pbr026913.1    | 2464                      | 8                  | 1089               |
| PbBZIP71    | Pbr027818.1    | 2761                      | 4                  | 1025               |
| PbBZIP72    | Pbr031203.1    | 4038                      | 4                  | 2175               |
| PbBZIP73    | Pbr033760.1    | 778                       | 1                  | 778                |
| PbBZIP74    | Pbr037165.1    | 7623                      | 12                 | 1896               |
| PbBZIP75    | Pbr016568.1    | 808                       | 1                  | 808                |
| PbBZIP76    | Pbr017979.1    | 776                       | 1                  | 776                |
| PbBZIP77    | Pbr022503.1    | 3477                      | 4                  | 1304               |
| PbBZIP78    | Pbr002338.1    | 6818                      | 12                 | 1260               |
| PbBZIP79    | Pbr003750.1    | 2302                      | 4                  | 726                |
| PbBZIP80    | Pbr005556.1    | 2763                      | 4                  | 1584               |
| PbBZIP81    | Pbr005557.1    | 3010                      | 4                  | 1734               |
| PbBZIP82    | Pbr006046.1    | 1764                      | 4                  | 1451               |
| PbBZIP83    | Pbr010436.1    | 4265                      | 3                  | 2289               |
| PbBZIP84    | Pbr040390.1    | 2420                      | 4                  | 1368               |
