# Supplementary material for: Identification of bZIP transcription factors and their responses to brown spot in pear
Source: PubMed Central journal article supplement (PMC8802300; doi:10.1590/1678-4685-gmb-2021-0175), 2022-01-31
Supplement: 1415-4757-GMB-45-1-e20210175-s4.pdf [file 1415-4757-GMB-45-1-e20210175-s4.pdf]

## “Supplementary Material to “Identification of bZIP transcription factors and their responses to brown spot in pear”

**Table S4** - Chromosomal locations and syntenic relationships of *PbbZIP* genes.

| Name     | Gene ID     | Chromosomal | Starting point | Stopping point | Strand |
|----------|-------------|-------------|----------------|----------------|--------|
| PbBZIP1  | Pbr029239.1 | Chr1        | 2389878        | 2390653        | +      |
| PbBZIP2  | Pbr021041.1 | Chr1        | 3250368        | 3253437        | +      |
| PbBZIP3  | Pbr012802.1 | Chr2        | 5526442        | 5528863        | -      |
| PbBZIP4  | Pbr015675.1 | Chr2        | 6170887        | 6178380        | -      |
| PbBZIP5  | Pbr022933.1 | Chr2        | 6976334        | 6977338        | -      |
| PbBZIP6  | Pbr022894.1 | Chr2        | 7309361        | 7312996        | -      |
| PbBZIP7  | Pbr024746.1 | Chr2        | 8549572        | 8555592        | +      |
| PbBZIP8  | Pbr001076.1 | Chr2        | 12231889       | 12232590       | +      |
| PbBZIP9  | Pbr040479.1 | Chr2        | 15517927       | 15519189       | +      |
| PbBZIP10 | Pbr022685.1 | Chr3        | 1149894        | 1151224        | +      |
| PbBZIP11 | Pbr026741.1 | Chr3        | 2967110        | 2969439        | +      |
| PbBZIP12 | Pbr003518.1 | Chr3        | 16831076       | 16838748       | +      |
| PbBZIP13 | Pbr003516.1 | Chr3        | 16858552       | 16861687       | -      |
| PbBZIP14 | Pbr013267.1 | Chr3        | 21256215       | 21259419       | -      |
| PbBZIP15 | Pbr013209.1 | Chr3        | 21719032       | 21719646       | -      |
| PbBZIP16 | Pbr013133.1 | Chr3        | 22249661       | 22252323       | +      |
| PbBZIP17 | Pbr013043.1 | Chr3        | 22992061       | 22996571       | -      |
| PbBZIP18 | Pbr010517.1 | Chr5        | 2957830        | 2961646        | -      |
| PbBZIP19 | Pbr030476.1 | Chr5        | 2296058        | 2297044        | +      |
| PbBZIP20 | Pbr027414.1 | Chr5        | 12967287       | 12968060       | +      |
| PbBZIP21 | Pbr035554.1 | Chr5        | 15980857       | 15981499       | -      |
| PbBZIP22 | Pbr025283.1 | Chr5        | 19163038       | 19165928       | +      |
| PbBZIP23 | Pbr014592.1 | Chr5        | 22847185       | 22851079       | +      |
| PbBZIP24 | Pbr014594.1 | Chr5        | 22872574       | 22879471       | -      |
| PbBZIP25 | Pbr020210.1 | Chr6        | 4248339        | 4248803        | -      |
| PbBZIP26 | Pbr014120.1 | Chr6        | 9323825        | 9326350        | -      |
| PbBZIP27 | Pbr015119.3 | Chr6        | 19889864       | 19891229       | +      |
| PbBZIP28 | Pbr016302.1 | Chr6        | 21111673       | 21117458       | +      |
| PbBZIP29 | Pbr002928.1 | Chr7        | 12429663       | 12431955       | +      |
| PbBZIP30 | Pbr002981.1 | Chr7        | 12802639       | 12804931       | -      |
| PbBZIP31 | Pbr009654.1 | Chr7        | 1362620        | 1366901        | +      |

| Name     | Gene ID     | Chromosomal | Starting point | Stopping point | Strand |
|----------|-------------|-------------|----------------|----------------|--------|
| PbBZIP32 | Pbr009693.1 | Chr7        | 1703894        | 1704403        | +      |
| PbBZIP33 | Pbr041663.1 | Chr7        | 2182780        | 2189697        | -      |
| PbBZIP34 | Pbr008557.1 | Chr8        | 2230491        | 2232813        | +      |
| PbBZIP35 | Pbr008558.1 | Chr8        | 2197741        | 2199160        | -      |
| PbBZIP36 | Pbr018746.1 | Chr8        | 10553837       | 10556712       | -      |
| PbBZIP37 | Pbr028080.1 | Chr8        | 14864215       | 14867148       | -      |
| PbBZIP38 | Pbr028081.1 | Chr8        | 14868512       | 14871116       | -      |
| PbBZIP39 | Pbr022222.1 | Chr9        | 18881465       | 18882206       | +      |
| PbBZIP40 | Pbr029701.1 | Chr9        | 14021920       | 14026128       | +      |
| PbBZIP41 | Pbr030604.1 | Chr9        | 19283974       | 19289990       | -      |
| PbBZIP42 | Pbr009074.1 | Chr10       | 10127839       | 10130049       | +      |
| PbBZIP43 | Pbr019461.1 | Chr10       | 22800599       | 22805346       | -      |
| PbBZIP44 | Pbr020743.1 | Chr10       | 17290780       | 17293582       | -      |
| PbBZIP45 | Pbr036339.1 | Chr10       | 19091541       | 19095601       | -      |
| PbBZIP46 | Pbr042765.1 | Chr10       | 17608035       | 17609699       | +      |
| PbBZIP47 | Pbr017284.1 | Chr11       | 24819436       | 24822037       | +      |
| PbBZIP48 | Pbr030829.1 | Chr11       | 565147         | 566497         | +      |
| PbBZIP49 | Pbr036605.1 | Chr11       | 18152763       | 18159417       | -      |
| PbBZIP50 | Pbr038249.1 | Chr11       | 4628100        | 4630519        | +      |
| PbBZIP51 | Pbr004364.1 | Chr12       | 2057108        | 2060551        | -      |
| PbBZIP52 | Pbr017778.1 | Chr12       | 20360616       | 20363301       | -      |
| PbBZIP53 | Pbr028659.1 | Chr12       | 12490432       | 12495989       | +      |
| PbBZIP54 | Pbr035863.1 | Chr12       | 16253048       | 16260463       | -      |
| PbBZIP55 | Pbr018534.1 | Chr13       | 7268883        | 7270283        | +      |
| PbBZIP56 | Pbr018536.1 | Chr13       | 7319005        | 7319433        | +      |
| PbBZIP57 | Pbr027468.1 | Chr13       | 2302476        | 2305727        | -      |
| PbBZIP58 | Pbr030038.1 | Chr13       | 4056908        | 4057801        | -      |
| PbBZIP59 | Pbr034805.1 | Chr13       | 14373472       | 14374939       | +      |
| PbBZIP60 | Pbr007163.1 | Chr14       | 14914116       | 14914754       | -      |
| PbBZIP61 | Pbr007589.1 | Chr14       | 344099         | 346885         | +      |
| PbBZIP62 | Pbr026723.2 | Chr14       | 8763592        | 8766217        | -      |
| PbBZIP63 | Pbr002622.1 | Chr15       | 999456         | 1002190        | +      |
| PbBZIP64 | Pbr005860.1 | Chr15       | 2664599        | 2667542        | -      |
| PbBZIP65 | Pbr005861.1 | Chr15       | 2671458        | 2674216        | -      |
| PbBZIP66 | Pbr005914.1 | Chr15       | 3000081        | 3001635        | -      |
| PbBZIP67 | Pbr009262.1 | Chr15       | 3989301        | 3992176        | +      |
| PbBZIP68 | Pbr017262.1 | Chr15       | 20035048       | 20037783       | +      |
| PbBZIP69 | Pbr019779.1 | Chr15       | 6992833        | 6993291        | -      |
| PbBZIP70 | Pbr026913.1 | Chr15       | 28456413       | 28458876       | -      |
| PbBZIP71 | Pbr027818.1 | Chr15       | 9823393        | 9826153        | +      |
| PbBZIP72 | Pbr031203.1 | Chr15       | 39848596       | 39852633       | -      |
| PbBZIP73 | Pbr033760.1 | Chr15       | 30168150       | 30168927       | +      |
| PbBZIP74 | Pbr037165.1 | Chr16       | 19058863       | 19066485       | -      |

| <b>Name</b> | <b>Gene ID</b> | <b>Chromosomal</b> | <b>Starting point</b> | <b>Stopping point</b> | <b>Strand</b> |
|-------------|----------------|--------------------|-----------------------|-----------------------|---------------|
| PbBZIP75    | Pbr016568.1    | Chr17              | 17890291              | 17891098              | +             |
| PbBZIP76    | Pbr017979.1    | Chr17              | 19768805              | 19769580              | -             |
| PbBZIP77    | Pbr022503.1    | Chr17              | 2569875               | 2573351               | +             |
| PbBZIP78    | Pbr002338.1    | scaffold1099.0     | 54879                 | 61696                 | -             |
| PbBZIP79    | Pbr003750.1    | scaffold1170.0     | 35506                 | 37807                 | -             |
| PbBZIP80    | Pbr005556.1    | scaffold1282.0     | 9370                  | 12132                 | +             |
| PbBZIP81    | Pbr005557.1    | scaffold1282.0     | 15287                 | 18296                 | +             |
| PbBZIP82    | Pbr006046.1    | scaffold1301.0     | 48                    | 1811                  | +             |
| PbBZIP83    | Pbr010436.1    | scaffold170.2.1    | 93882                 | 98146                 | -             |
| PbBZIP84    | Pbr040390.1    | scaffold888.0      | 59641                 | 62060                 | +             |
