# Supplementary material for: Identification of bZIP transcription factors and their responses to brown spot in pear
Source: PubMed Central journal article supplement (PMC8802300; doi:10.1590/1678-4685-gmb-2021-0175), 2022-01-31
Supplement: 1415-4757-GMB-45-1-e20210175-s5.pdf [file 1415-4757-GMB-45-1-e20210175-s5.pdf]

**“Supplementary Material to “Identification of bZIP transcription factors and their responses to brown spot in pear”**

**Table S5** - Detail information and expression of genes involved in BS formation.

| GeneID    | Pathway Name                               | Level 1                              | Level 2             | CK_1     | CK_2     | CK_3  | BS_1  | BS_2     | BS_3     | GA <sub>3</sub> _1 | GA <sub>3</sub> _2 | GA <sub>3</sub> _3 | Description                       | Abbreviation |
|-----------|--------------------------------------------|--------------------------------------|---------------------|----------|----------|-------|-------|----------|----------|--------------------|--------------------|--------------------|-----------------------------------|--------------|
|           |                                            |                                      |                     | FPK<br>M | FPK<br>M |       | FPKM  | FPK<br>M | FPK<br>M | FPK<br>M           | FPK<br>M           | FPK<br>M           |                                   |              |
| 103931970 | ko04075//Plant hormone signal transduction | Environmental Information Processing | Signal transduction | 53.14    | 57.64    | 71.39 | 96.21 | 94.22    | 96.37    | 95.75              | 90.95              | 89.46              | bZIP transcription factor 53-like | PbbZIP53     |
| 103957504 | ko04075//Plant hormone signal transduction | Environmental Information Processing | Signal transduction | 4.24     | 5.18     | 5.34  | 4.94  | 12.75    | 9.47     | 4.41               | 5.92               | 4.81               | basic leucine zipper 9-like       | PbbZIP9      |
| 103961780 | ko04075//Plant hormone signal transduction | Environmental Information Processing | Signal transduction | 76.59    | 76.53    | 76.24 | 94.71 | 89.46    | 95.04    | 72.16              | 74.78              | 90.61              | bZIP transcription factor 60      | PbbZIP60     |

| GeneID   | Pathway Name                               | Level 1                              | Level 2             | CK_1<br>FPK<br>M | CK_2<br>FPK<br>M | CK_3<br>FPKM | BS_1<br>FPK<br>M | BS_2<br>FPK<br>M | BS_3<br>FPK<br>M | GA <sub>3</sub> _1<br>FPK<br>M | GA <sub>3</sub> _2<br>FPK<br>M | GA <sub>3</sub> _3<br>FPK<br>M | Description                       | Abbreviation |
|----------|--------------------------------------------|--------------------------------------|---------------------|------------------|------------------|--------------|------------------|------------------|------------------|--------------------------------|--------------------------------|--------------------------------|-----------------------------------|--------------|
| 10392854 | ko04075//Plant hormone signal transduction | Environmental Information Processing | Signal transduction | 568.91           | 608.32           | 568.91       | 303.02           | 561.8            | 190.29           | 614.45                         | 783.93                         | 589.39                         | bZIP transcription factor 44      | PbbZIP44     |
| 10393382 | ko04075//Plant hormone signal transduction | Environmental Information Processing | Signal transduction | 0.08             | 0.45             | 0.96         | 0.37             | 0.66             | 3.24             | 1.64                           | 2.24                           | 1.5                            | bZIP transcription factor 2-like  | PbbZIP2      |
| 10393603 | ko04075//Plant hormone signal transduction | Environmental Information Processing | Signal transduction | 6.75             | 8.88             | 9.81         | 13.15            | 11.94            | 14.19            | 11.9                           | 11.37                          | 12.28                          | bZIP transcription factor 16-like | PbbZIP16     |
| 10393780 | ko04075//Plant hormone signal transduction | Environmental Information Processing | Signal transduction | 9.21             | 11.66            | 13.05        | 60.5             | 25.7             | 43.56            | 14.02                          | 13.89                          | 13.51                          | bZIP transcription factor 11-like | PbbZIP11     |
| 10394549 | ko04075//Plant hormone signal transduction | Environmental Information Processing | Signal transduction | 40.59            | 38.43            | 39.53        | 52.73            | 43.24            | 45.06            | 38.68                          | 39.5                           | 42.94                          | bZIP transcription factor 17-like | PbbZIP17     |

| GeneID    | Pathway Name                                                                                                                 | Level 1                                         | Level 2                                                                                    | CK_1<br>FPK<br>M | CK_2<br>FPK<br>M | CK_3<br>FPKM | BS_1<br>FPK<br>M | BS_2<br>FPK<br>M | BS_3<br>FPK<br>M | GA <sub>3_</sub><br>1<br>FPK<br>M | GA <sub>3_</sub><br>2<br>FPK<br>M | GA <sub>3_</sub><br>3<br>FPK<br>M | Description                        | Abbreviation |
|-----------|------------------------------------------------------------------------------------------------------------------------------|-------------------------------------------------|--------------------------------------------------------------------------------------------|------------------|------------------|--------------|------------------|------------------|------------------|-----------------------------------|-----------------------------------|-----------------------------------|------------------------------------|--------------|
| 103928345 | ko04075//Plant hormone signal transduction                                                                                   | Environmental Information Processing            | Signal transduction                                                                        | 0.29             | 0.17             | 0.23         | 2.75             | 0.45             | 2.13             | 0.11                              | 0.36                              | 0.17                              | gibberellin receptor<br>GID1C-like | GID1C        |
| 103959978 | ko01110//Biosynthesis of secondary metabolites;ko00943//Isoflavonoid biosynthesis;ko04075//Plant hormone signal transduction | Metabolism;Environmental Information Processing | Biosynthesis of other secondary metabolites; Signal transduction; Global and overview maps | 143.36           | 63.51            | 109.01       | 459.79           | 93.61            | 244.51           | 79.55                             | 51.27                             | 110.71                            | probable carboxylesterase 15       | CES15        |
| 103962043 | ko04075//Plant hormone signal transduction                                                                                   | Environmental Information Processing            | Signal transduction                                                                        | 74.44            | 120.78           | 93.31        | 20.58            | 63.6             | 34.17            | 154.68                            | 118.17                            | 140.04                            | probable carboxylesterase 18       | CES18        |
| 103931198 | ko04075//Plant hormone                                                                                                       | Environmental Information Processing            | Signal transduction                                                                        | 1.93             | 2.81             | 3.63         | 8.4              | 4.51             | 5.28             | 2.09                              | 2.59                              | 4.45                              | scarecrow-like protein 21          | SCL21        |

| GeneID   | Pathway Name                                                      | Level 1                              | Level 2             | CK_1<br>FPK<br>M | CK_2<br>FPK<br>M | CK_3<br>FPKM | BS_1<br>FPK<br>M | BS_2<br>FPK<br>M | BS_3<br>FPK<br>M | GA <sub>3</sub><br>1<br>FPK<br>M | GA <sub>3</sub><br>2<br>FPK<br>M | GA <sub>3</sub><br>3<br>FPK<br>M | Description               | Abbreviation |
|----------|-------------------------------------------------------------------|--------------------------------------|---------------------|------------------|------------------|--------------|------------------|------------------|------------------|----------------------------------|----------------------------------|----------------------------------|---------------------------|--------------|
| 10393501 | signal transduction<br>ko04075//Plant hormone signal transduction | Environmental Information Processing | Signal transduction | 2.07             | 0.78             | 1.37         | 4.26             | 3.5              | 4.48             | 1.8                              | 2.05                             | 1.9                              | scarecrow-like protein 22 | SCL22        |
| 10394152 | signal transduction<br>ko04075//Plant hormone signal transduction | Environmental Information Processing | Signal transduction | 1.93             | 3.48             | 2.36         | 10.09            | 4.71             | 10.75            | 6.23                             | 6.85                             | 5.75                             | scarecrow-like protein 4  | SCL4         |
| 10395428 | signal transduction<br>ko04075//Plant hormone signal transduction | Environmental Information Processing | Signal transduction | 1.61             | 2.5              | 1.87         | 3.98             | 4.15             | 5.82             | 1.76                             | 2.02                             | 1.61                             | scarecrow-like protein 14 | SCL14        |
| 10396021 | signal transduction<br>ko04075//Plant hormone signal transduction | Environmental Information Processing | Signal transduction | 0.15             | 0.2              | 0.26         | 0.09             | 0.48             | 1.29             | 0.34                             | 0.36                             | 0.2                              | protein SCARECROW 2-like  | SCL2         |
| 10396318 | signal transduction<br>ko04075//Plant hormone signal transduction | Environmental Information Processing | Signal transduction | 0                | 0.1              | 0.04         | 0.55             | 0.06             | 0.27             | 0.11                             | 0.39                             | 0.03                             | scarecrow-like protein 15 | SCL15        |

| GeneID    | Pathway Name                                                                 | Level 1                                                 | Level 2                                      | CK_1<br>FPK<br>M | CK_2<br>FPK<br>M | CK_3<br>FPKM | BS_1<br>FPK<br>M | BS_2<br>FPK<br>M | BS_3<br>FPK<br>M | GA <sub>3</sub> _1<br>FPK<br>M | GA <sub>3</sub> _2<br>FPK<br>M | GA <sub>3</sub> _3<br>FPK<br>M | Description                       | Abbreviation |
|-----------|------------------------------------------------------------------------------|---------------------------------------------------------|----------------------------------------------|------------------|------------------|--------------|------------------|------------------|------------------|--------------------------------|--------------------------------|--------------------------------|-----------------------------------|--------------|
| 103964673 | ko04075//Plant hormone signal transduction                                   | Environmental Information Processing                    | Signal transduction                          | 6.64             | 5.8              | 6.77         | 13.08            | 10.45            | 15.52            | 7.35                           | 6.87                           | 8.38                           | scarecrow-like protein 33         | SCL33        |
| 103964676 | ko04075//Plant hormone signal transduction                                   | Environmental Information Processing                    | Signal transduction                          | 2.09             | 0.99             | 1.42         | 10.92            | 9.49             | 18.32            | 1.82                           | 1.97                           | 1.84                           | scarecrow-like protein 30         | SCL30        |
| 103964678 | ko04075//Plant hormone signal transduction                                   | Environmental Information Processing                    | Signal transduction                          | 30.52            | 19.6             | 25.63        | 65.77            | 52.21            | 70.38            | 26.87                          | 23.76                          | 29.35                          | scarecrow-like protein 11         | SCL11        |
| 103927146 | ko04075//Plant hormone signal transduction;ko04712//Circadian rhythm - plant | Environmental Information Processing;Organismal Systems | Signal transduction;Environmental adaptation | 8.72             | 3.9              | 7.11         | 2.75             | 3.68             | 1.1              | 5.33                           | 3.56                           | 4.19                           | transcription factor bHLH137-like | bHLH137      |
| 103929400 | ko04712//Circadian rhythm -                                                  | Organismal Systems;Environmental                        | Environmental adaptation;S                   | 8.14             | 3.92             | 3.83         | 23.12            | 6.74             | 16.76            | 3.09                           | 4.92                           | 2.55                           | transcription factor bHLH68-      | bHLH68       |

| GeneID    | Pathway Name                                                                            | Level 1                                                 | Level 2                                             | CK_1     | CK_2     | CK_3 | BS_1     | BS_2     | BS_3     | GA <sub>3_</sub> | GA <sub>3_</sub> | GA <sub>3_</sub> | Description                                 | Abbreviation |
|-----------|-----------------------------------------------------------------------------------------|---------------------------------------------------------|-----------------------------------------------------|----------|----------|------|----------|----------|----------|------------------|------------------|------------------|---------------------------------------------|--------------|
|           |                                                                                         |                                                         |                                                     | FPK<br>M | FPK<br>M | FPKM | FPK<br>M | FPK<br>M | FPK<br>M | 1<br>FPK<br>M    | 2<br>FPK<br>M    | 3<br>FPK<br>M    |                                             |              |
| 103932057 | plant;ko04075<br>//Plant hormone<br>signal<br>transduction<br>ko04712//Circadian rhythm | Information Processing                                  | ignal<br>transduction                               |          |          |      |          |          |          |                  |                  |                  | like isoform<br>X1                          |              |
|           | plant;ko04075<br>//Plant hormone<br>signal<br>transduction<br>ko04712//Circadian rhythm | Organismal Systems;Environmental Information Processing | Signal<br>transduction<br>;Environmental adaptation | 13.13    | 6.18     | 8.19 | 29.12    | 16.82    | 34.43    | 9.9              | 8.14             | 11.29            | transcription<br>factor<br>bHLH128          | bHLH128      |
|           | plant;ko04075<br>//Plant hormone<br>signal<br>transduction                              | Environmental Information Processing;Organismal Systems | Environmental adaptation;Signal<br>transduction     | 2.06     | 2.26     | 1.65 | 0.63     | 1.68     | 0.34     | 2.11             | 2.08             | 1.52             | transcription<br>factor<br>bHLH113-<br>like | bHLH113      |

| GeneID   | Pathway Name                                                 | Level 1                                                             | Level 2                           | CK_1<br>FPK<br>M | CK_2<br>FPK<br>M | CK_3<br>FPKM | BS_1<br>FPK<br>M | BS_2<br>FPK<br>M | BS_3<br>FPK<br>M | GA <sub>3</sub> _1<br>FPK<br>M | GA <sub>3</sub> _2<br>FPK<br>M | GA <sub>3</sub> _3<br>FPK<br>M | Description                      | Abbreviation |
|----------|--------------------------------------------------------------|---------------------------------------------------------------------|-----------------------------------|------------------|------------------|--------------|------------------|------------------|------------------|--------------------------------|--------------------------------|--------------------------------|----------------------------------|--------------|
| 10393915 | ko04075//Plant hormone signal transduction                   | Environmental Information Processing                                | Signal transduction               | 3.09             | 1.1              | 1.96         | 10.44            | 10.02            | 12.3             | 2.61                           | 2.12                           | 4.06                           | transcription factor bHLH48-like | bHLH48       |
| 10394909 | ko04075//Plant hormone signal transduction                   | Environmental Information Processing                                | Signal transduction               | 0.08             | 0.31             | 0.04         | 0.31             | 0.47             | 2.09             | 0.4                            | 0.55                           | 0.24                           | transcription factor bHLH66-like | bHLH66       |
| 10396138 | ko03010//Ribosome;ko04075//Plant hormone signal transduction | Environmental Information Processing;Genetic Information Processing | Translation; Signal transduction  | 0.73             | 2.04             | 1.44         | 6.34             | 8.44             | 11.64            | 2.79                           | 1.98                           | 2.23                           | transcription factor bHLH62      | bHLH62       |
| 10396272 | ko04075//Plant hormone signal transduction                   | Environmental Information Processing                                | Signal transduction               | 4.7              | 3.86             | 3.97         | 12.37            | 6.13             | 7.97             | 4.23                           | 3.15                           | 5.29                           | transcription factor bHLH145     | bHLH145      |
| 10396699 | ko04712//Circadian rhythm - plant;ko04075                    | Organismal Systems;Environmental                                    | Signal transduction;Environmental | 3.26             | 1.43             | 1.41         | 0.65             | 1.46             | 0                | 1.85                           | 1.61                           | 1.24                           | transcription factor bHLH49-     | bHLH49       |

| GeneID | Pathway Name                        | Level 1                | Level 2         | CK_1 | CK_2 | CK_3 | BS_1 | BS_2 | BS_3 | GA <sub>3</sub> _1 | GA <sub>3</sub> _2 | GA <sub>3</sub> _3 | Description     | Abbreviation |
|--------|-------------------------------------|------------------------|-----------------|------|------|------|------|------|------|--------------------|--------------------|--------------------|-----------------|--------------|
|        |                                     |                        |                 | FPK  | FPK  | FPKM | FPK  | FPK  | FPK  | FPK                | FPK                | FPK                |                 |              |
|        | //Plant hormone signal transduction | Information Processing | ntal adaptation | M    | M    |      | M    | M    | M    | M                  | M                  | M                  | like isoform X2 |              |



| GeneID          | Pathway Name | Level 1                                    | Level 2                              | CK_1<br>FPKM        | CK_2<br>FPKM | CK_3<br>FPKM<br>M | BS_1<br>FPKM<br>M | BS_2<br>FPKM<br>M | BS_3<br>FPKM<br>M | GA <sub>3</sub> _1<br>FPKM<br>M | GA <sub>3</sub> _2<br>FPKM | GA <sub>3</sub> _3<br>FPKM<br>M | Description | Abbreviation                      |          |
|-----------------|--------------|--------------------------------------------|--------------------------------------|---------------------|--------------|-------------------|-------------------|-------------------|-------------------|---------------------------------|----------------------------|---------------------------------|-------------|-----------------------------------|----------|
| bZIP family TFs | 10393197     | ko04075//Plant hormone signal transduction | Environmental Information Processing | Signal transduction | 53.14        | 57.64             | 71.39             | 96.21             | 94.22             | 96.37                           | 95.75                      | 90.95                           | 89.46       | bZIP transcription factor 53-like | PbbZIP53 |
|                 | 10395750     | ko04075//Plant hormone signal transduction | Environmental Information Processing | Signal transduction | 4.24         | 5.18              | 5.34              | 4.94              | 12.75             | 9.47                            | 4.41                       | 5.92                            | 4.81        | basic leucine zipper 9-like       | PbbZIP9  |
|                 | 10396178     | ko04075//Plant hormone signal transduction | Environmental Information Processing | Signal transduction | 76.59        | 76.53             | 76.24             | 94.71             | 89.46             | 95.04                           | 72.16                      | 74.78                           | 90.61       | bZIP transcription factor 60      | PbbZIP60 |
|                 | 10392854     | ko04075//Plant hormone signal transduction | Environmental Information Processing | Signal transduction | 568.91       | 608.32            | 568.91            | 303.02            | 561.8             | 190.29                          | 614.45                     | 783.93                          | 589.39      | bZIP transcription factor 44      | PbbZIP44 |
|                 | 10393382     | ko04075//Plant hormone signal transduction | Environmental Information Processing | Signal transduction | 0.08         | 0.45              | 0.96              | 0.37              | 0.66              | 3.24                            | 1.64                       | 2.24                            | 1.5         | bZIP transcription factor 2-like  | PbbZIP2  |
|                 | 10393603     | ko04075//Plant hormone signal transduction | Environmental Information Processing | Signal transduction | 6.75         | 8.88              | 9.81              | 13.15             | 11.94             | 14.19                           | 11.9                       | 11.37                           | 12.28       | bZIP transcription factor 16-like | PbbZIP16 |
|                 | 10393780     | ko04075//Plant hormone signal transduction | Environmental Information Processing | Signal transduction | 9.21         | 11.66             | 13.05             | 60.5              | 25.7              | 43.56                           | 14.02                      | 13.89                           | 13.51       | bZIP transcription factor 11-like | PbbZIP11 |

|                    |          |                                                                                                                              |                                                 |                                                                                            |        |        |        |        |       |        |        |        |        |                                   |          |
|--------------------|----------|------------------------------------------------------------------------------------------------------------------------------|-------------------------------------------------|--------------------------------------------------------------------------------------------|--------|--------|--------|--------|-------|--------|--------|--------|--------|-----------------------------------|----------|
| Gibberellin signal | 10394549 | ko04075//Plant hormone signal transduction                                                                                   | Environmental Information Processing            | Signal transduction                                                                        | 40.59  | 38.43  | 39.53  | 52.73  | 43.24 | 45.06  | 38.68  | 39.5   | 42.94  | bZIP transcription factor 17-like | PbbZIP17 |
|                    | 10392834 | ko04075//Plant hormone signal transduction                                                                                   | Environmental Information Processing            | Signal transduction                                                                        | 0.29   | 0.17   | 0.23   | 2.75   | 0.45  | 2.13   | 0.11   | 0.36   | 0.17   | gibberellin receptor GID1C-like   | GID1C    |
|                    | 10395997 | ko01110//Biosynthesis of secondary metabolites;ko00943//Isoflavonoid biosynthesis;ko04075//Plant hormone signal transduction | Metabolism;Environmental Information Processing | Biosynthesis of other secondary metabolites; Signal transduction; Global and overview maps | 143.36 | 63.51  | 109.01 | 459.79 | 93.61 | 244.51 | 79.55  | 51.27  | 110.71 | probable carboxylesterase 15      | CES15    |
|                    | 10396204 | ko04075//Plant hormone signal transduction                                                                                   | Environmental Information Processing            | Signal transduction                                                                        | 74.44  | 120.78 | 93.31  | 20.58  | 63.6  | 34.17  | 154.68 | 118.17 | 140.04 | probable carboxylesterase 18      | CES18    |
|                    | 10393119 | ko04075//Plant hormone signal transduction                                                                                   | Environmental Information Processing            | Signal transduction                                                                        | 1.93   | 2.81   | 3.63   | 8.4    | 4.51  | 5.28   | 2.09   | 2.59   | 4.45   | scarecrow-like protein 21         | SCL21    |

|          |   |                                                                                |                                             |                        |      |      |      |       |       |       |      |      |      |                                  |       |
|----------|---|--------------------------------------------------------------------------------|---------------------------------------------|------------------------|------|------|------|-------|-------|-------|------|------|------|----------------------------------|-------|
| 10393501 | 4 | signal<br>transduction<br>ko04075//Plan<br>t hormone<br>signal<br>transduction | Environmenta<br>l Information<br>Processing | Signal<br>transduction | 2.07 | 0.78 | 1.37 | 4.26  | 3.5   | 4.48  | 1.8  | 2.05 | 1.9  | scarecrow-<br>like protein<br>22 | SCL22 |
| 10394152 | 3 | signal<br>transduction<br>ko04075//Plan<br>t hormone<br>signal<br>transduction | Environmenta<br>l Information<br>Processing | Signal<br>transduction | 1.93 | 3.48 | 2.36 | 10.09 | 4.71  | 10.75 | 6.23 | 6.85 | 5.75 | scarecrow-<br>like protein<br>4  | SCL4  |
| 10395428 | 8 | signal<br>transduction<br>ko04075//Plan<br>t hormone<br>signal<br>transduction | Environmenta<br>l Information<br>Processing | Signal<br>transduction | 1.61 | 2.5  | 1.87 | 3.98  | 4.15  | 5.82  | 1.76 | 2.02 | 1.61 | scarecrow-<br>like protein<br>14 | SCL14 |
| 10396021 | 4 | signal<br>transduction<br>ko04075//Plan<br>t hormone<br>signal<br>transduction | Environmenta<br>l Information<br>Processing | Signal<br>transduction | 0.15 | 0.2  | 0.26 | 0.09  | 0.48  | 1.29  | 0.34 | 0.36 | 0.2  | protein<br>SCARECR<br>OW 2-like  | SCL2  |
| 10396318 | 4 | signal<br>transduction<br>ko04075//Plan<br>t hormone<br>signal<br>transduction | Environmenta<br>l Information<br>Processing | Signal<br>transduction | 0    | 0.1  | 0.04 | 0.55  | 0.06  | 0.27  | 0.11 | 0.39 | 0.03 | scarecrow-<br>like protein<br>15 | SCL15 |
| 10396467 | 3 | signal<br>transduction<br>ko04075//Plan<br>t hormone<br>signal<br>transduction | Environmenta<br>l Information<br>Processing | Signal<br>transduction | 6.64 | 5.8  | 6.77 | 13.08 | 10.45 | 15.52 | 7.35 | 6.87 | 8.38 | scarecrow-<br>like protein<br>33 | SCL33 |

|          |   |                                                                              |                                                         |                                              |       |      |       |       |       |       |       |       |       |                                             |         |
|----------|---|------------------------------------------------------------------------------|---------------------------------------------------------|----------------------------------------------|-------|------|-------|-------|-------|-------|-------|-------|-------|---------------------------------------------|---------|
| 10396467 | 6 | ko04075//Plant hormone signal transduction                                   | Environmental Information Processing                    | Signal transduction                          | 2.09  | 0.99 | 1.42  | 10.92 | 9.49  | 18.32 | 1.82  | 1.97  | 1.84  | scarecrow-like protein 30                   | SCL30   |
| 10396467 | 8 | ko04075//Plant hormone signal transduction                                   | Environmental Information Processing                    | Signal transduction                          | 30.52 | 19.6 | 25.63 | 65.77 | 52.21 | 70.38 | 26.87 | 23.76 | 29.35 | scarecrow-like protein 11                   | SCL11   |
| 10392714 | 6 | ko04075//Plant hormone signal transduction;ko04712//Circadian rhythm - plant | Environmental Information Processing;Organismal Systems | Signal transduction;Environmental adaptation | 8.72  | 3.9  | 7.11  | 2.75  | 3.68  | 1.1   | 5.33  | 3.56  | 4.19  | transcription factor bHLH137-like           | bHLH137 |
| 10392940 | 0 | ko04712//Circadian rhythm - plant;ko04075//Plant hormone signal transduction | Organismal Systems;Environmental Information Processing | Environmental adaptation;Signal transduction | 8.14  | 3.92 | 3.83  | 23.12 | 6.74  | 16.76 | 3.09  | 4.92  | 2.55  | transcription factor bHLH68-like isoform X1 | bHLH68  |
| 10393205 | 7 | ko04712//Circadian rhythm - plant;ko04075//Plant                             | Organismal Systems;Environmental                        | Signal transduction;Environmental            | 13.13 | 6.18 | 8.19  | 29.12 | 16.82 | 34.43 | 9.9   | 8.14  | 11.29 | transcription factor bHLH128                | bHLH128 |

|               |                                                                                                                                                                                                                                                                                                                      |                                                                                                                                                                                                                                                                       |                                                                                                                                                                           |      |      |      |       |       |       |      |      |      |                                             |         |
|---------------|----------------------------------------------------------------------------------------------------------------------------------------------------------------------------------------------------------------------------------------------------------------------------------------------------------------------|-----------------------------------------------------------------------------------------------------------------------------------------------------------------------------------------------------------------------------------------------------------------------|---------------------------------------------------------------------------------------------------------------------------------------------------------------------------|------|------|------|-------|-------|-------|------|------|------|---------------------------------------------|---------|
|               | hormone<br>signal<br>transduction<br>ko04712//Circadian rhythm -<br>plant;ko04075//Plant<br>hormone<br>signal<br>transduction<br>ko04075//Plant<br>hormone<br>signal<br>transduction<br>ko04075//Plant<br>hormone<br>signal<br>transduction<br>ko03010//Ribosome;ko04075//Plant<br>hormone<br>signal<br>transduction | Information<br>Processing<br>Environmental Information Processing;Organismal Systems<br>Environmental Information Processing<br>Environmental Information Processing<br>Environmental Information Processing;Genetic Information Processing<br>Information Processing | ntal<br>adaptation<br>Environmental<br>tal<br>adaptation;Signal<br>transduction<br>Signal<br>transduction<br>Signal<br>transduction<br>Translation;Signal<br>transduction | 2.06 | 2.26 | 1.65 | 0.63  | 1.68  | 0.34  | 2.11 | 2.08 | 1.52 | transcription<br>factor<br>bHLH113-<br>like | bHLH113 |
| 10393690<br>3 |                                                                                                                                                                                                                                                                                                                      |                                                                                                                                                                                                                                                                       |                                                                                                                                                                           | 3.09 | 1.1  | 1.96 | 10.44 | 10.02 | 12.3  | 2.61 | 2.12 | 4.06 | transcription<br>factor<br>bHLH48-<br>like  | bHLH48  |
| 10393915<br>7 |                                                                                                                                                                                                                                                                                                                      |                                                                                                                                                                                                                                                                       |                                                                                                                                                                           | 0.08 | 0.31 | 0.04 | 0.31  | 0.47  | 2.09  | 0.4  | 0.55 | 0.24 | transcription<br>factor<br>bHLH66-<br>like  | bHLH66  |
| 10394909<br>4 |                                                                                                                                                                                                                                                                                                                      |                                                                                                                                                                                                                                                                       |                                                                                                                                                                           | 0.73 | 2.04 | 1.44 | 6.34  | 8.44  | 11.64 | 2.79 | 1.98 | 2.23 | transcription<br>factor<br>bHLH62           | bHLH62  |
| 10396138<br>5 |                                                                                                                                                                                                                                                                                                                      |                                                                                                                                                                                                                                                                       |                                                                                                                                                                           |      |      |      |       |       |       |      |      |      |                                             |         |

|          |                                                                              |                                                         |                                              |      |      |      |       |      |      |      |      |      |                      |                        |
|----------|------------------------------------------------------------------------------|---------------------------------------------------------|----------------------------------------------|------|------|------|-------|------|------|------|------|------|----------------------|------------------------|
| 10396272 | ko04075//Plant hormone signal transduction                                   | Environmental Information Processing                    | Signal transduction                          | 4.7  | 3.86 | 3.97 | 12.37 | 6.13 | 7.97 | 4.23 | 3.15 | 5.29 | transcription factor | bHLH145                |
| 10396699 | ko04712//Circadian rhythm - plant;ko04075//Plant hormone signal transduction | Organismal Systems;Environmental Information Processing | Signal transduction;Environmental adaptation | 3.26 | 1.43 | 1.41 | 0.65  | 1.46 | 0    | 1.85 | 1.61 | 1.24 | transcription factor | bHLH49-like isoform X2 |

---
